# Supplementary material for: Berberine Encapsulated Lecithin–Chitosan Nanoparticles as Innovative Wound Healing Agent in Type II Diabetes
Source: MDPI journal article supplement (doi:10.3390/pharmaceutics13081197), 2021-08-04
Supplement: s1 [file s1]

# Supplementary Materials: Berberine Encapsulated Lecithin–Chitosan Nanoparticles as Innovative Wound Healing Agent in Type II Diabetes

Dibya Sundar Panda, Hussein M. Eid, Mohammed H. Elkomy, Ahmed Khames, Randa M. Hassan, Fatma I. Abo El-Ela and Heba A. Yassin

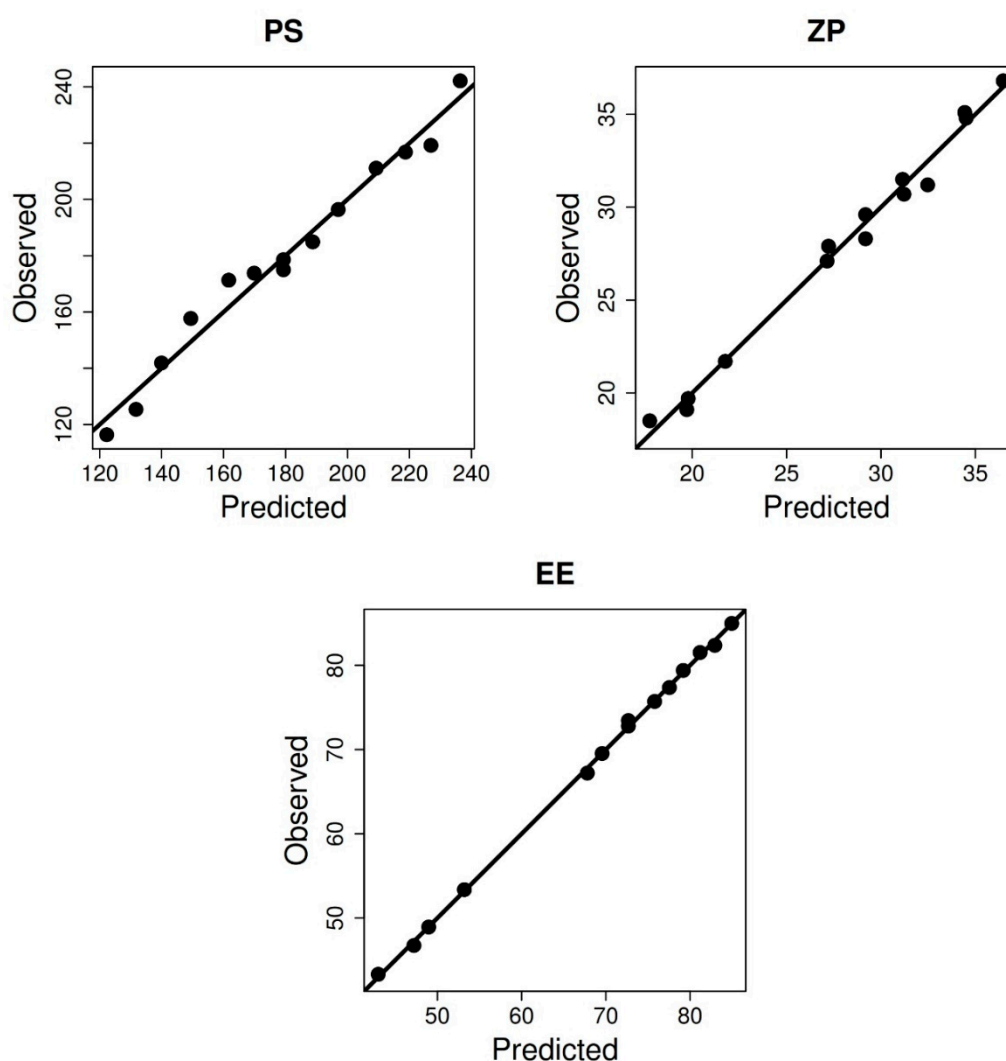

**Figure S1.** Plot of observed versus model predicted responses.

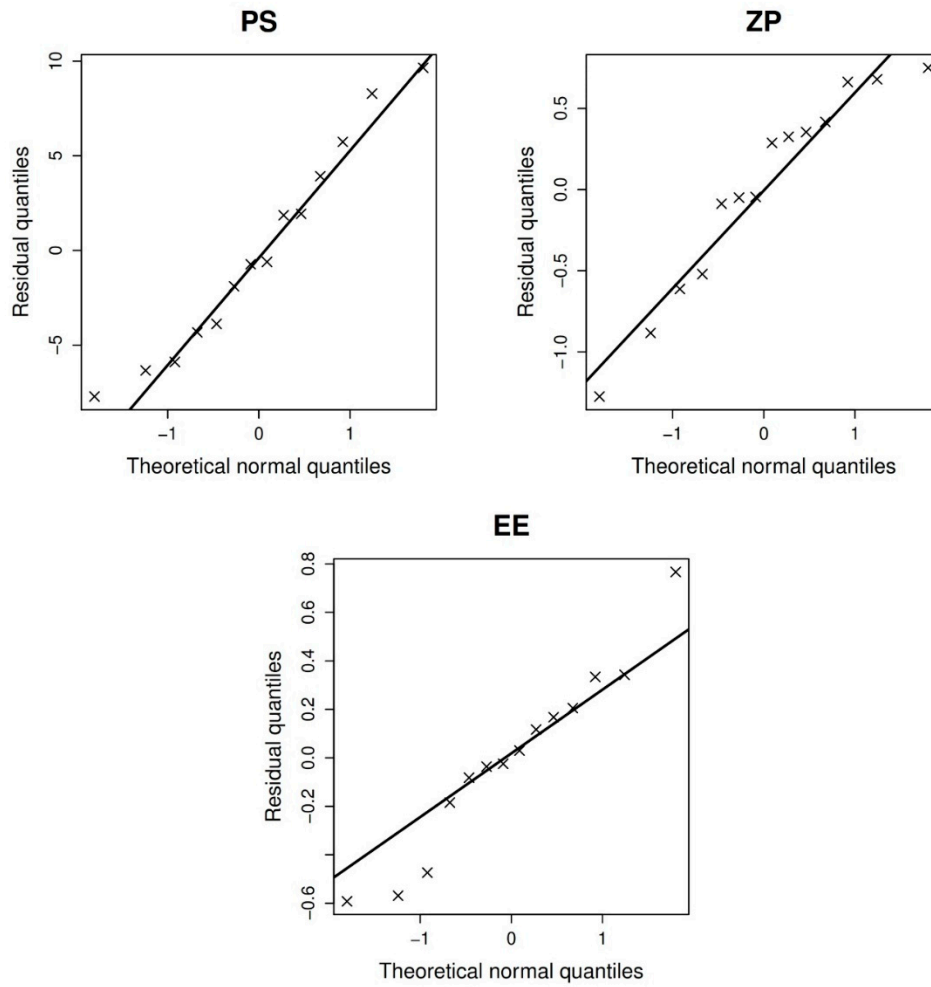

**Figure S2.** Normal quantile-quantile plots of residual errors.

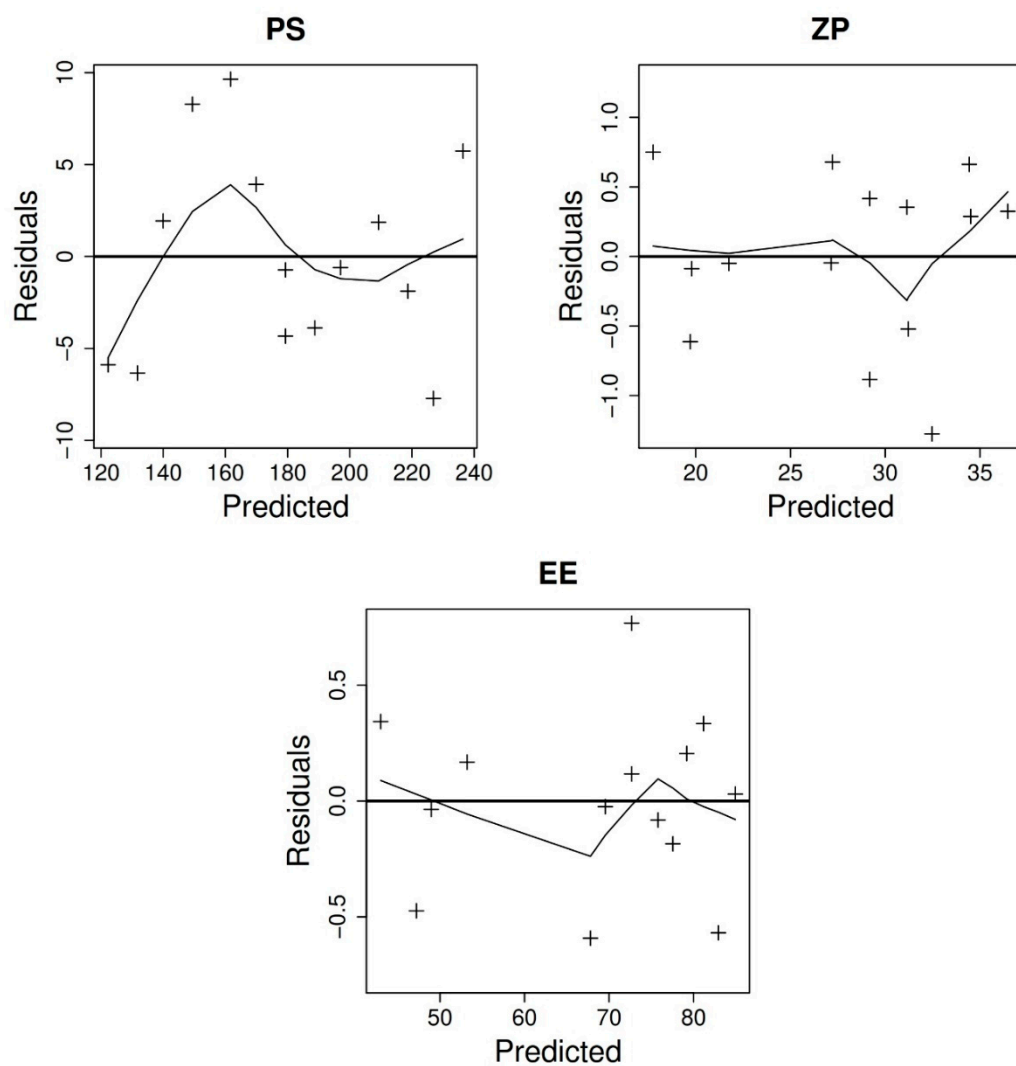

**Figure S3.** Plot of residual error versus model predicted responses.

**Table S1.** Analysis of variance (ANOVA) of the final models for measured responses.

| Parameters                    | SS       | DF | MS       | F       | <i>p</i> -value | Parameters                  | SS     | DF | MS     | F      | <i>p</i> -value |
|-------------------------------|----------|----|----------|---------|-----------------|-----------------------------|--------|----|--------|--------|-----------------|
| <b>PS</b>                     |          |    |          |         |                 | <b>ZP</b>                   |        |    |        |        |                 |
| <b>Model</b>                  | 16727.44 | 3  | 5575.81  | 137.16  | < 0.0001        | <b>Model</b>                | 0.7118 | 4  | 0.1779 | 259.58 | < 0.0001        |
| X <sub>1</sub>                | 135.30   | 1  | 135.30   | 3.33    | 0.0912          | X <sub>1</sub>              | 0.0407 | 1  | 0.0407 | 59.39  | < 0.0001        |
| X <sub>2</sub>                | 15120.61 | 1  | 15120.61 | 371.96  | < 0.0001        | X <sub>2</sub>              | 0.6207 | 1  | 0.6207 | 905.47 | < 0.0001        |
| X <sub>3</sub>                | 1471.53  | 1  | 1471.53  | 36.20   | < 0.0001        | X <sub>3</sub>              | 0.0001 | 1  | 0.0001 | 0.1206 | 0.7344          |
| <b>Residual</b>               | 528.47   | 13 | 40.65    |         |                 | X <sub>2</sub> <sup>2</sup> | 0.0503 | 1  | 0.0503 | 73.35  | < 0.0001        |
| Lack of Fit                   | 444.75   | 9  | 49.42    | 2.36    | 0.2118          | <b>Residual</b>             | 0.0082 | 12 | 0.0007 |        |                 |
| Pure Error                    | 83.72    | 4  | 20.93    |         |                 | Lack of Fit                 | 0.0043 | 8  | 0.0005 | 0.5478 | 0.7827          |
| <b>Cor Total</b>              | 17255.90 | 16 |          |         |                 | Pure Error                  | 0.0039 | 4  | 0.0010 |        |                 |
|                               |          |    |          |         |                 | <b>Cor Total</b>            | 0.7200 | 16 |        |        |                 |
| Parameters                    | SS       | DF | MS       | F       | <i>p</i> -value |                             |        |    |        |        |                 |
| <b>EE</b>                     |          |    |          |         |                 |                             |        |    |        |        |                 |
| <b>Model</b>                  | 2683.58  | 5  | 536.72   | 699.43  | < 0.0001        |                             |        |    |        |        |                 |
| X <sub>1</sub>                | 6.14     | 1  | 6.14     | 8.00    | 0.0164          |                             |        |    |        |        |                 |
| X <sub>2</sub>                | 127.68   | 1  | 127.68   | 166.39  | < 0.0001        |                             |        |    |        |        |                 |
| X <sub>3</sub>                | 2308.26  | 1  | 2308.26  | 3008.03 | < 0.0001        |                             |        |    |        |        |                 |
| X <sub>2</sub> X <sub>3</sub> | 5.00     | 1  | 5.00     | 6.51    | 0.0269          |                             |        |    |        |        |                 |
| X <sub>3</sub> <sup>2</sup>   | 236.50   | 1  | 236.50   | 308.20  | < 0.0001        |                             |        |    |        |        |                 |
| <b>Residual</b>               | 8.44     | 11 | 0.7674   |         |                 |                             |        |    |        |        |                 |
| Lack of Fit                   | 1.11     | 7  | 0.1590   | 0.0868  | 0.9966          |                             |        |    |        |        |                 |
| Pure Error                    | 7.33     | 4  | 1.83     |         |                 |                             |        |    |        |        |                 |
| <b>Cor Total</b>              | 2692.02  | 16 |          |         |                 |                             |        |    |        |        |                 |
